# Supplementary material for: Urinary Metabolomic Analysis of Prostate Cancer by UPLC-FTMS and UPLC-Ion Trap MSn
Source: MDPI journal article supplement (doi:10.3390/diagnostics13132270), 2023-07-04

|   |      |                                          |
|---|------|------------------------------------------|
| 2 | name | N2, N2-dimethylguanosine, (m/z 334.1126) |
|---|------|------------------------------------------|

|    |          |
|----|----------|
| RT | 10.3 min |
|----|----------|

### Interpretation

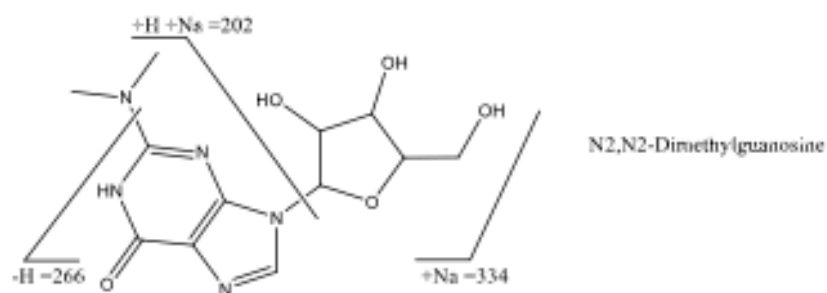

### Product ion spectrum of m/z 334.1 ion

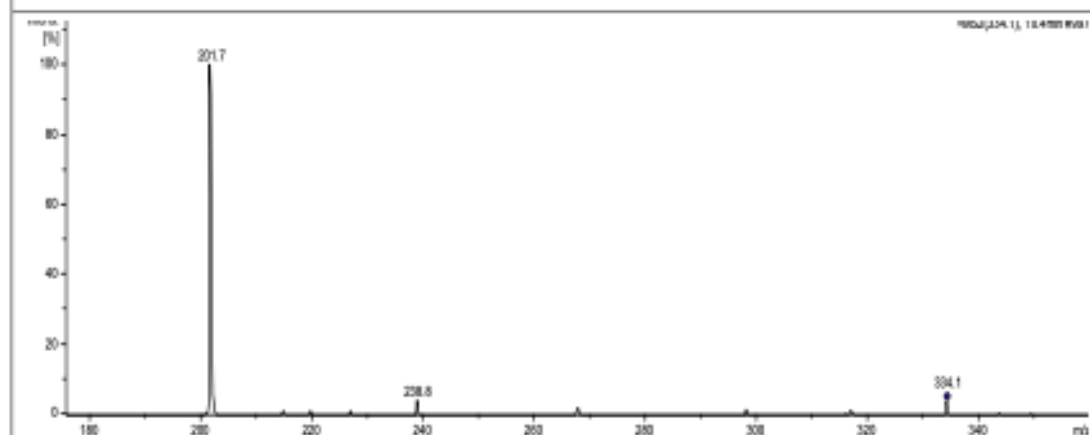

### Product ion spectrum of standard

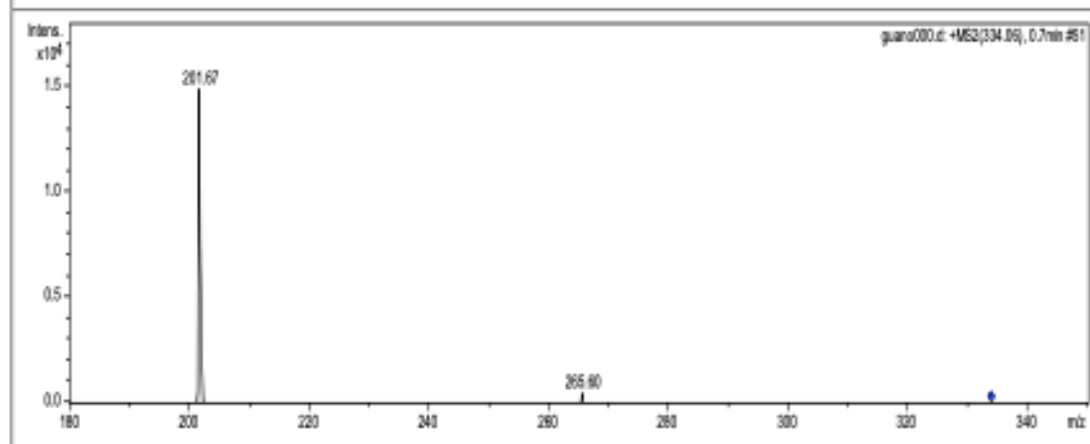

|                                                                                                                                                                                                         |          |                                        |
|---------------------------------------------------------------------------------------------------------------------------------------------------------------------------------------------------------|----------|----------------------------------------|
| 3                                                                                                                                                                                                       | name     | phenylacetyl L-glutamine(m/z 551.2124) |
| RT                                                                                                                                                                                                      | 12.1 min |                                        |
| Interpretation                                                                                                                                                                                          |          |                                        |
| 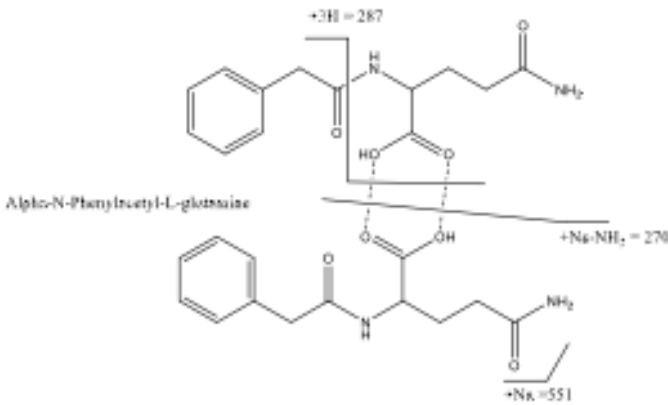 <p>Alpha-N-Phenylacetyl-L-glutamine</p> <p>+3H<sup>+</sup> = 287</p> <p>+Na-NH<sub>2</sub> = 270</p> <p>+Na = 551</p> |          |                                        |
| Product ion spectrum of m/z 551.1 ion                                                                                                                                                                   |          |                                        |
|  <p>482.5(51.1), 12.099 #7761</p>                                                                                    |          |                                        |
| Product ion spectrum of standard                                                                                                                                                                        |          |                                        |
|  <p>482.5(51.2), 0.8min #62</p>                                                                                     |          |                                        |

|   |      |                                      |
|---|------|--------------------------------------|
| 4 | name | 7-ketodeoxycholic acid(m/z 407.2798) |
|---|------|--------------------------------------|

|    |          |
|----|----------|
| RT | 16.8 min |
|----|----------|

# Interpretation

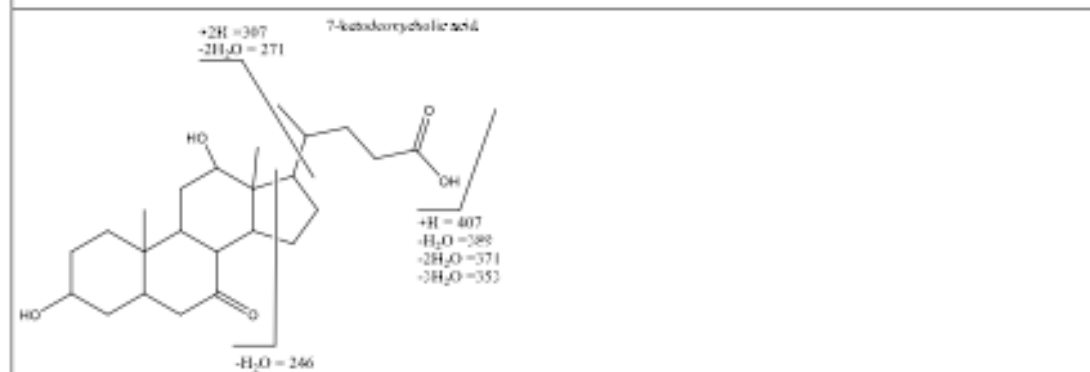

# Product ion spectrum of m/z 407.2 ion

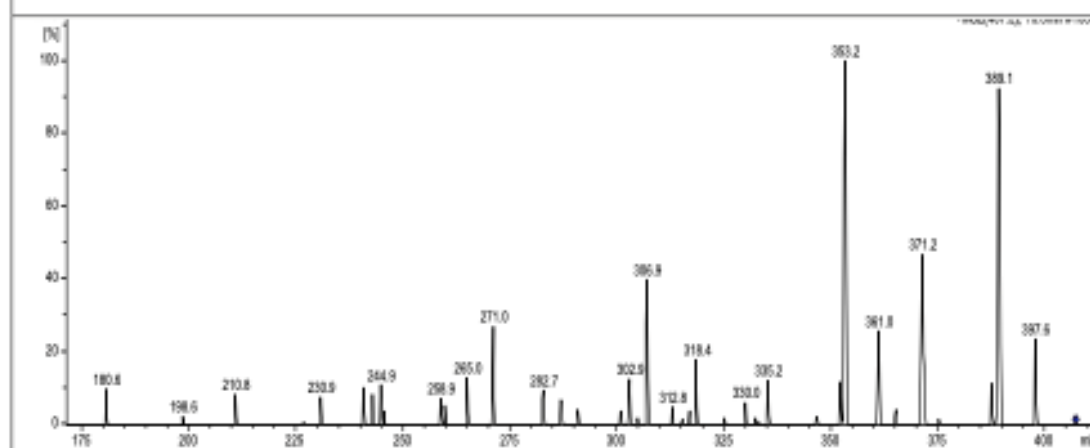

# Product ion spectrum of standard

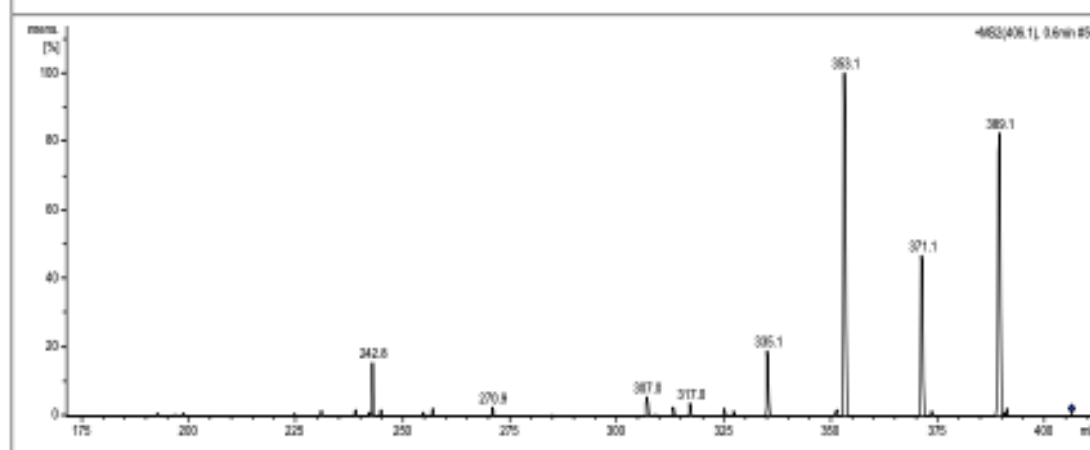

|   |      |                       |
|---|------|-----------------------|
| 5 | name | Ala Asp(m/z 227.0599) |
|---|------|-----------------------|

|    |          |
|----|----------|
| RT | 12.5 min |
|----|----------|

### Interpretation

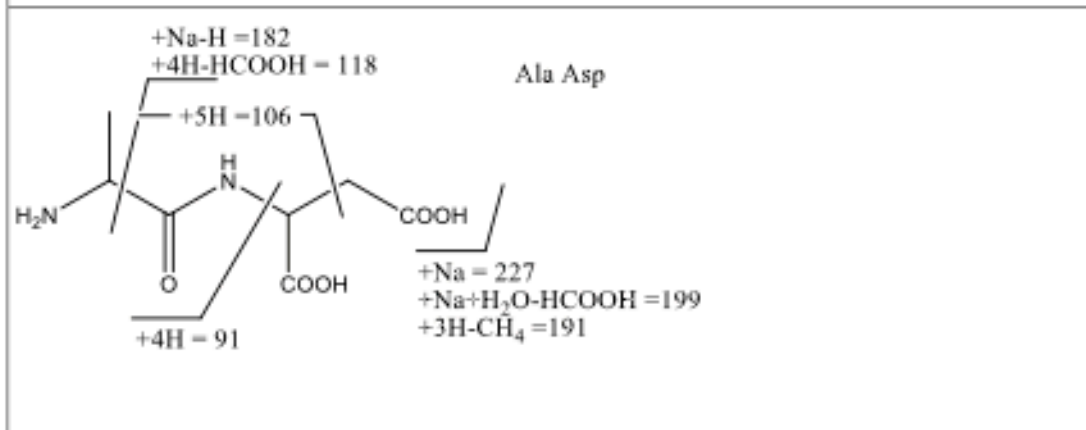

### Product ion spectrum of m/z 227.1 ion

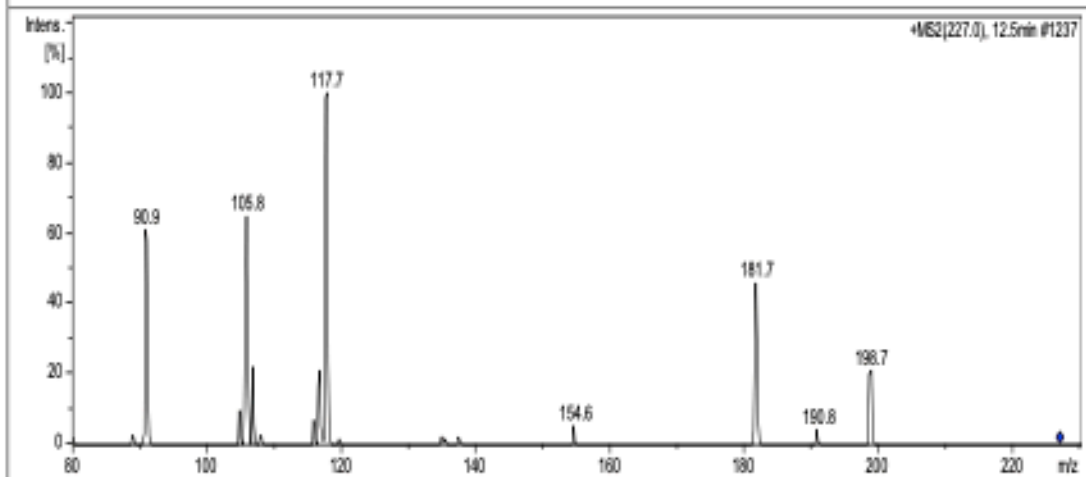

### Product ion spectrum of standard

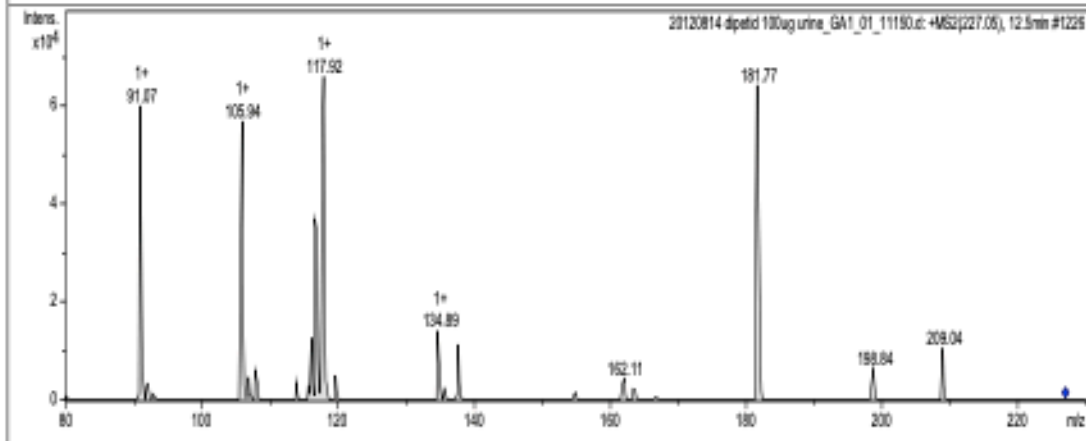

Supplement: s1 [file s1]
