# Supplementary material for: Urinary Metabolomic Analysis of Prostate Cancer by UPLC-FTMS and UPLC-Ion Trap MSn
Source: MDPI journal article supplement (doi:10.3390/diagnostics13132270), 2023-07-04

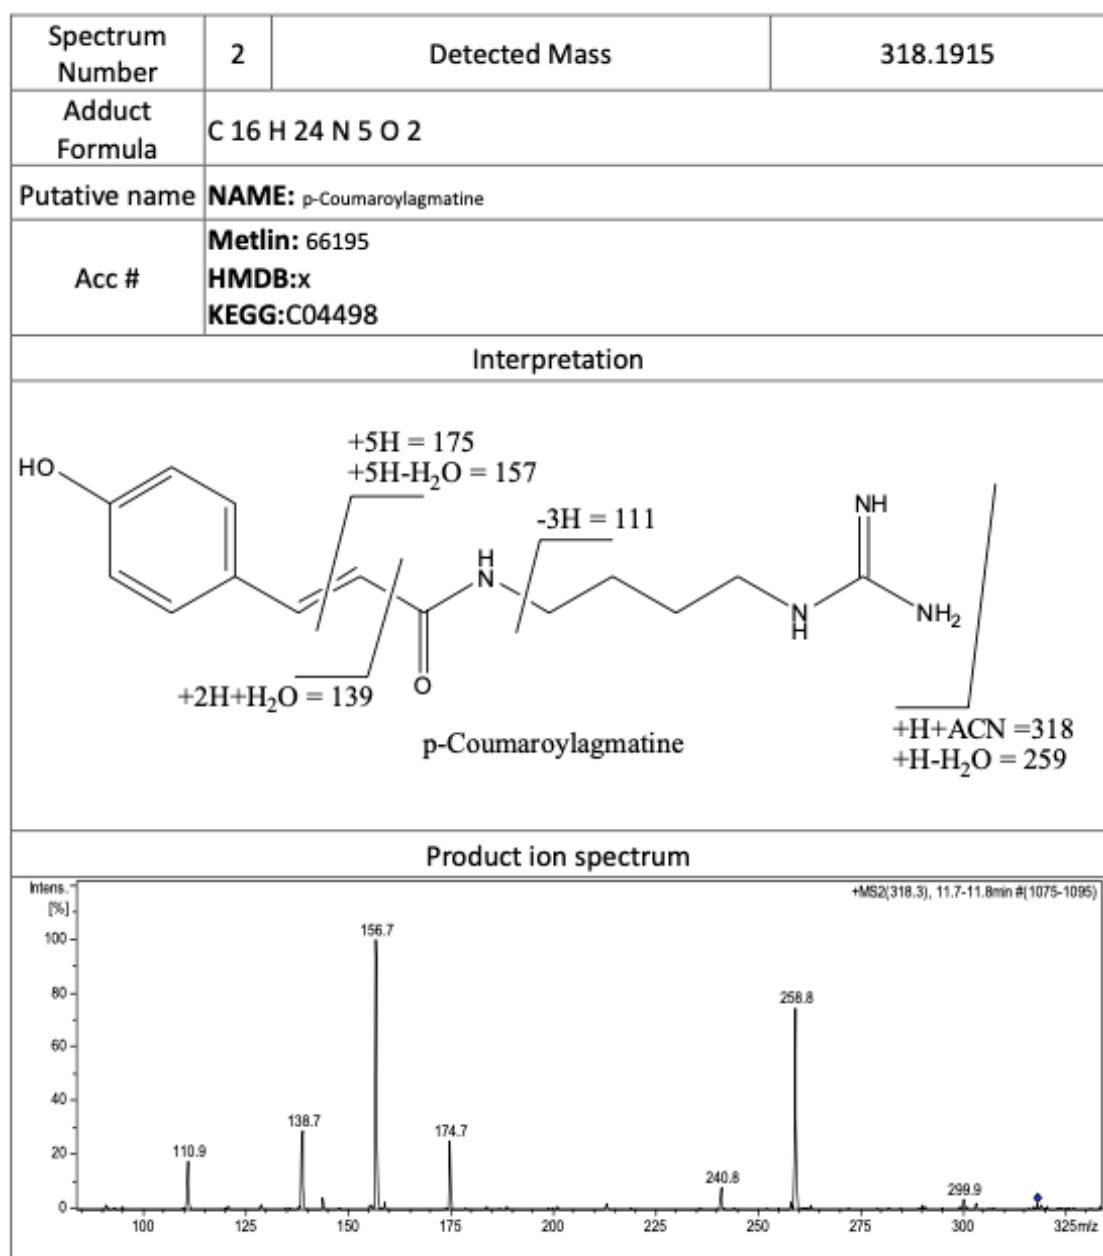

|                 |                                                                 |               |          |
|-----------------|-----------------------------------------------------------------|---------------|----------|
| Spectrum Number | 3                                                               | Detected Mass | 185.1286 |
| Adduct Formula  | C9H17N2O2                                                       |               |          |
| Putative name   | <b>NAME:</b> 1-Aminocyclohexanecarboxylic acid                  |               |          |
| Acc #           | <b>Metlin:</b> 6589<br><b>HMDB:</b> HMDB02279<br><b>KEGG:</b> x |               |          |

### Interpretation

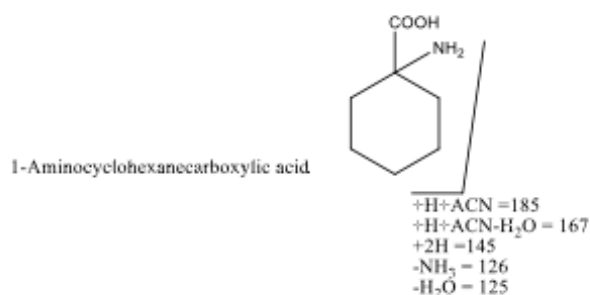

### Product ion spectrum

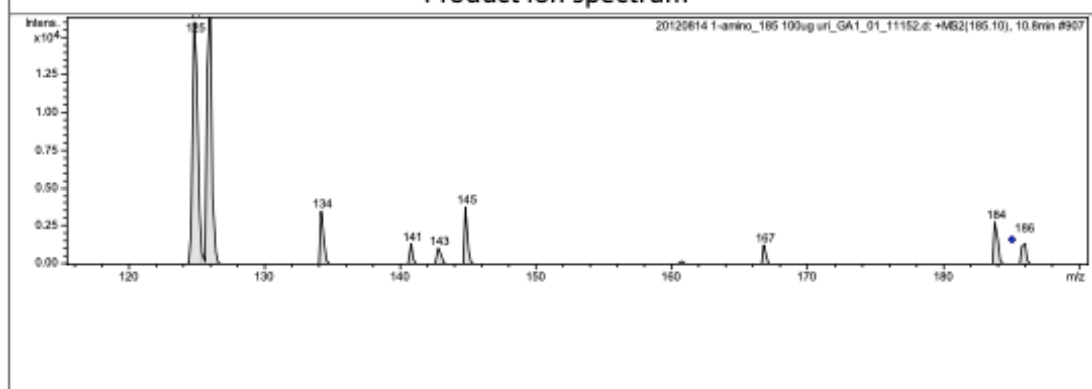

|                 |                                                                 |               |          |
|-----------------|-----------------------------------------------------------------|---------------|----------|
| Spectrum Number | 4                                                               | Detected Mass | 207.1107 |
| Adduct Formula  | C 9 H 16 N 2 Na O 2                                             |               |          |
| Putative name   | <b>NAME:</b> 1-Aminocyclohexanecarboxylic acid                  |               |          |
| Acc #           | <b>Metlin:</b> 6589<br><b>HMDB:</b> HMDB02279<br><b>KEGG:</b> x |               |          |

#### Interpretation

1-Aminocyclohexanecarboxylic acid

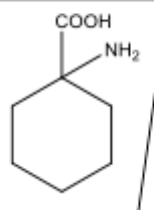

$+Na+ACN = 207$   
 $+Na+ACN-H_2O = 189$   
 $+Na+ACN-NH_3+5H = 195$   
 $+NH_4 = 161$   
 $+5H-NH_3 = 131$

#### Product ion spectrum

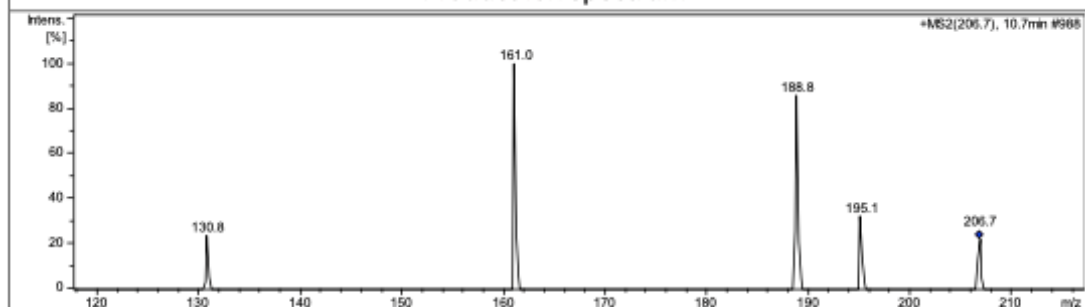

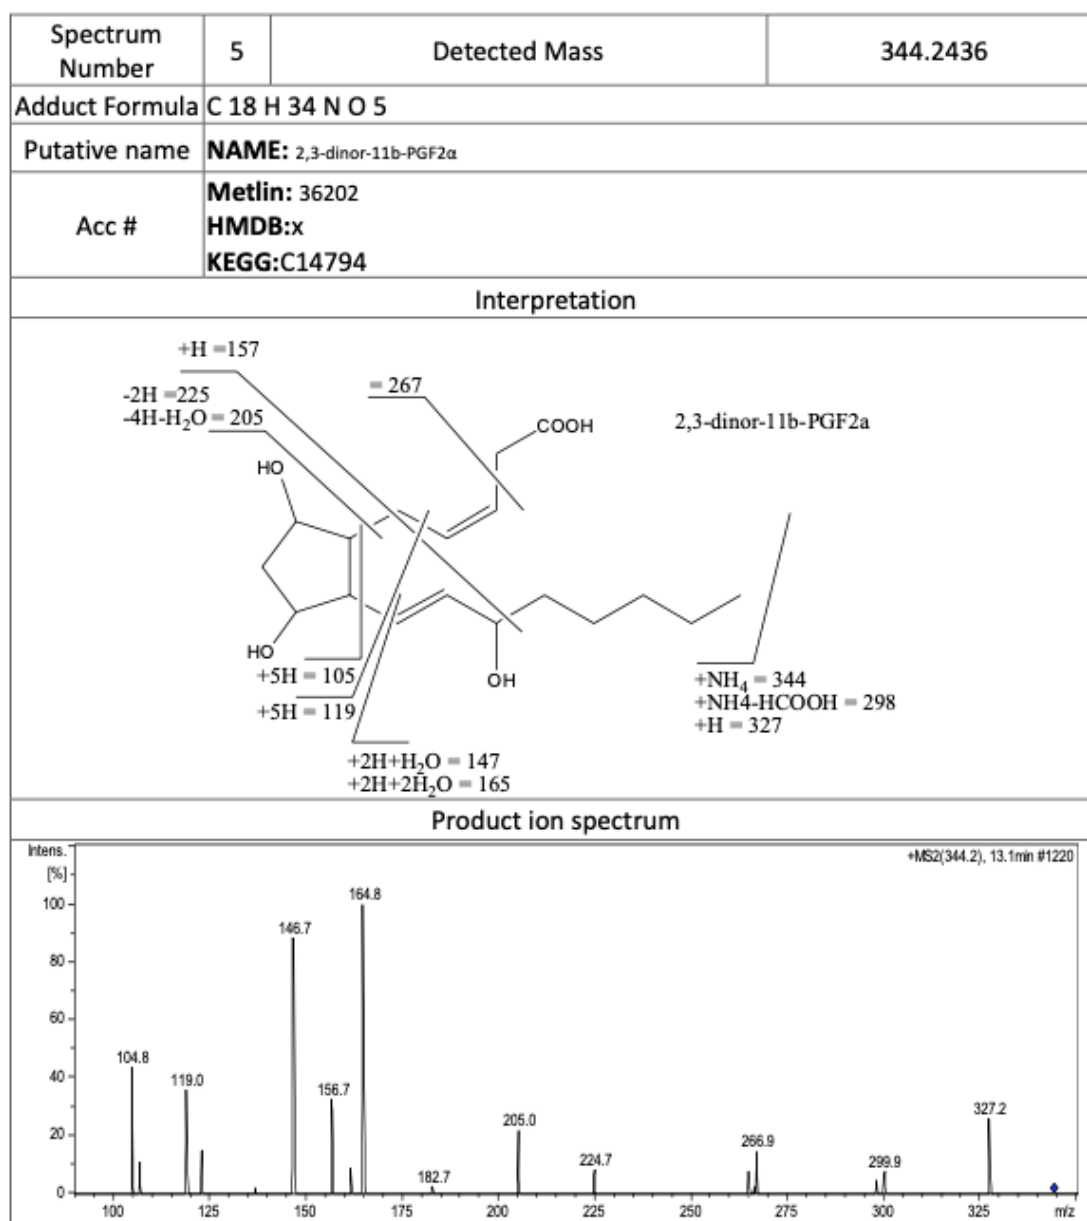

|                 |                                                                                                                           |               |          |
|-----------------|---------------------------------------------------------------------------------------------------------------------------|---------------|----------|
| Spectrum Number | 6                                                                                                                         | Detected Mass | 441.2987 |
| Adduct Formula  | C 26 H 42 Na O 4                                                                                                          |               |          |
| Putative name   | <b>NAME:</b> (24R)-1 $\alpha$ ,24-dihydroxy-22-oxacholecalciferol<br>(24S)-1 $\alpha$ ,24-dihydroxy-22-oxacholecalciferol |               |          |
| Acc #           | <b>Metlin:</b> 41996<br>41998<br><b>HMDB:</b> x<br><b>KEGG:</b> x                                                         |               |          |

### Interpretation

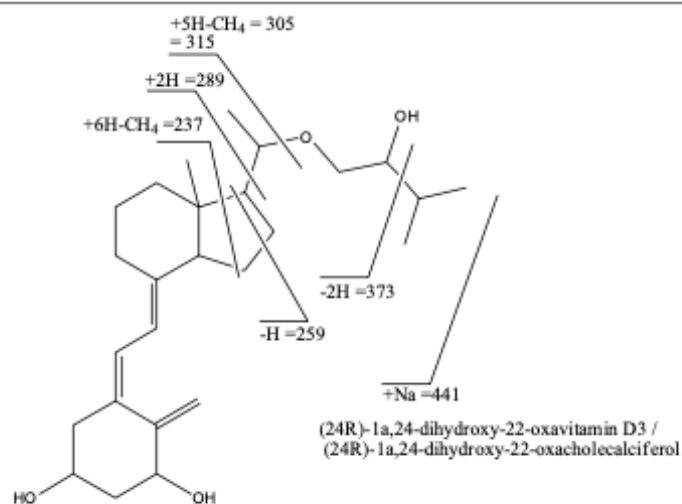

### Product ion spectrum

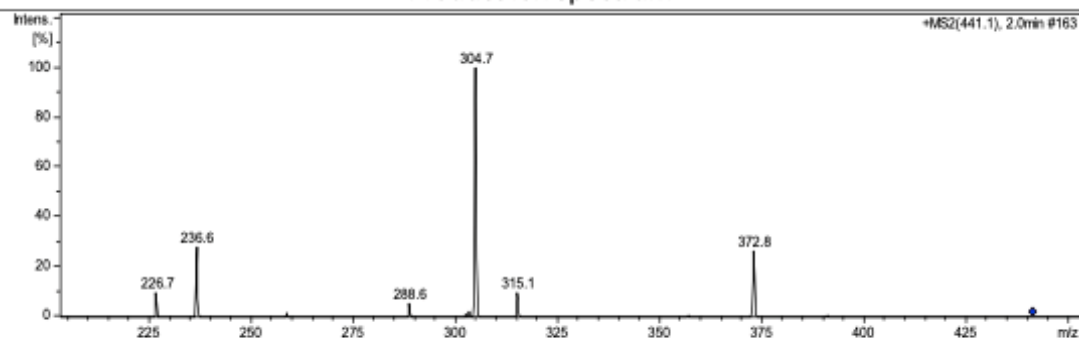

|                 |                                                                 |               |          |
|-----------------|-----------------------------------------------------------------|---------------|----------|
| Spectrum Number | 7                                                               | Detected Mass | 334.1135 |
| Adduct Formula  | C 12 H 17 N 5 Na O 5                                            |               |          |
| Putative name   | <b>NAME:</b> N2,N2-Dimethylguanosine                            |               |          |
| Acc #           | <b>Metlin:</b> 7086<br><b>HMDB:</b> HMDB04824<br><b>KEGG:</b> x |               |          |

### Interpretation

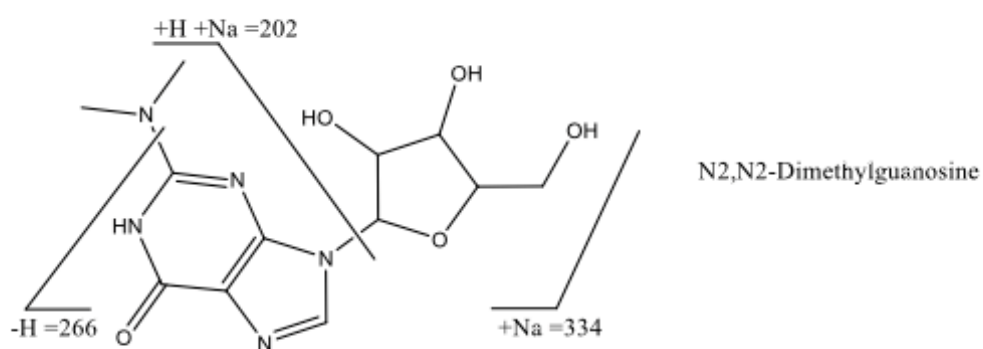

### Product ion spectrum

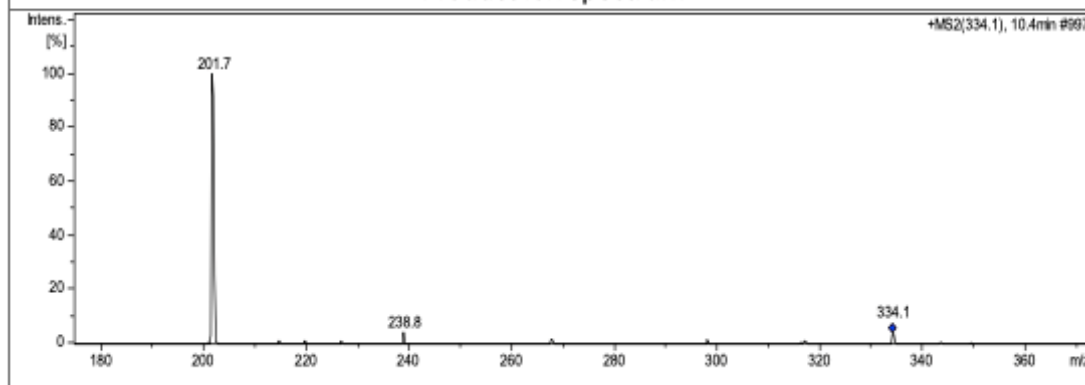





|                 |                                                              |               |          |
|-----------------|--------------------------------------------------------------|---------------|----------|
| Spectrum Number | 9                                                            | Detected Mass | 679.4108 |
| Adduct Formula  | C 37 H 55 N 6 O 6                                            |               |          |
| Putative name   | <b>NAME:</b> L-Urobilinogen                                  |               |          |
| Acc #           | <b>Metlin:</b> x<br><b>HMDB:</b> HMDB04157<br><b>KEGG:</b> x |               |          |

### Interpretation

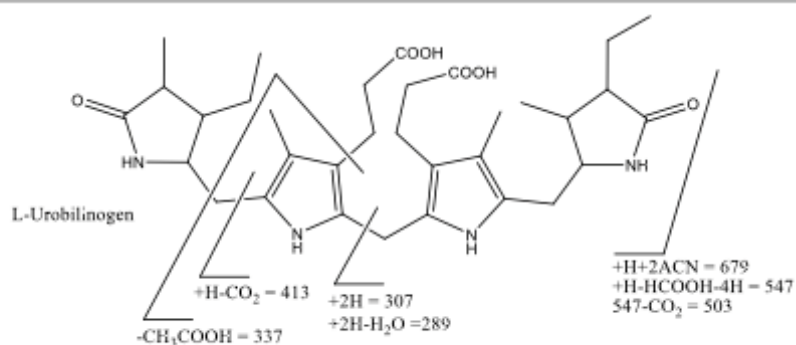

### Product ion spectrum

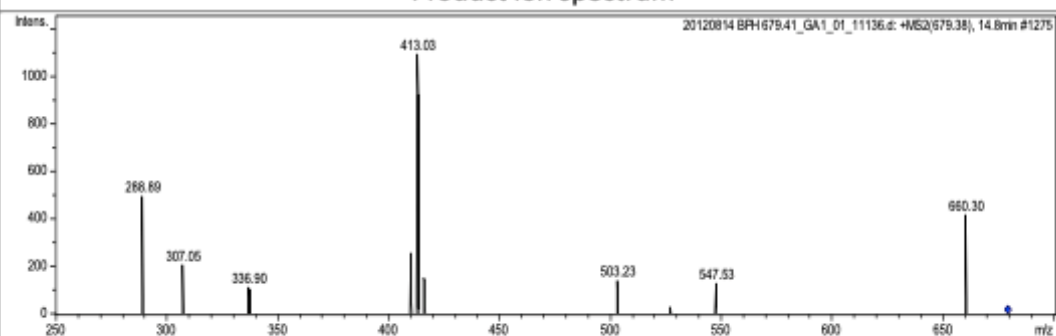

|                                                                                                                                                                                                                                                                                                                                                                                                                                                                                                                                                                                                                                                                                                                                                                                          |                                                                                                                                                                                                                                                                                                                       |               |          |
|------------------------------------------------------------------------------------------------------------------------------------------------------------------------------------------------------------------------------------------------------------------------------------------------------------------------------------------------------------------------------------------------------------------------------------------------------------------------------------------------------------------------------------------------------------------------------------------------------------------------------------------------------------------------------------------------------------------------------------------------------------------------------------------|-----------------------------------------------------------------------------------------------------------------------------------------------------------------------------------------------------------------------------------------------------------------------------------------------------------------------|---------------|----------|
| Spectrum Number                                                                                                                                                                                                                                                                                                                                                                                                                                                                                                                                                                                                                                                                                                                                                                          | 10                                                                                                                                                                                                                                                                                                                    | Detected Mass | 459.3336 |
| Adduct Formula                                                                                                                                                                                                                                                                                                                                                                                                                                                                                                                                                                                                                                                                                                                                                                           | C 29 H 47 O 2 S                                                                                                                                                                                                                                                                                                       |               |          |
| Putative name                                                                                                                                                                                                                                                                                                                                                                                                                                                                                                                                                                                                                                                                                                                                                                            | <b>NAME:</b> 1 $\alpha$ ,25-dihydroxy-24a-homo-26,27-dimethyl-22-thiavitamin D3<br>1 $\alpha$ ,25-dihydroxy-24a-homo-26,27-dimethyl-22-thiacholecalciferol<br>1 $\alpha$ ,25-dihydroxy-26,27-dimethyl-24a-homo-22-thia-20-epivitamin D3<br>1 $\alpha$ ,25-dihydroxy-26,27-dimethyl-24a-homo-22-thia-20-epicholecalcif |               |          |
| Acc #                                                                                                                                                                                                                                                                                                                                                                                                                                                                                                                                                                                                                                                                                                                                                                                    | <b>Metlin:</b> 42352<br>42353<br>42354<br>42355<br><b>HMDB:</b> x<br><b>KEGG:</b> x                                                                                                                                                                                                                                   |               |          |
| Interpretation                                                                                                                                                                                                                                                                                                                                                                                                                                                                                                                                                                                                                                                                                                                                                                           |                                                                                                                                                                                                                                                                                                                       |               |          |
| 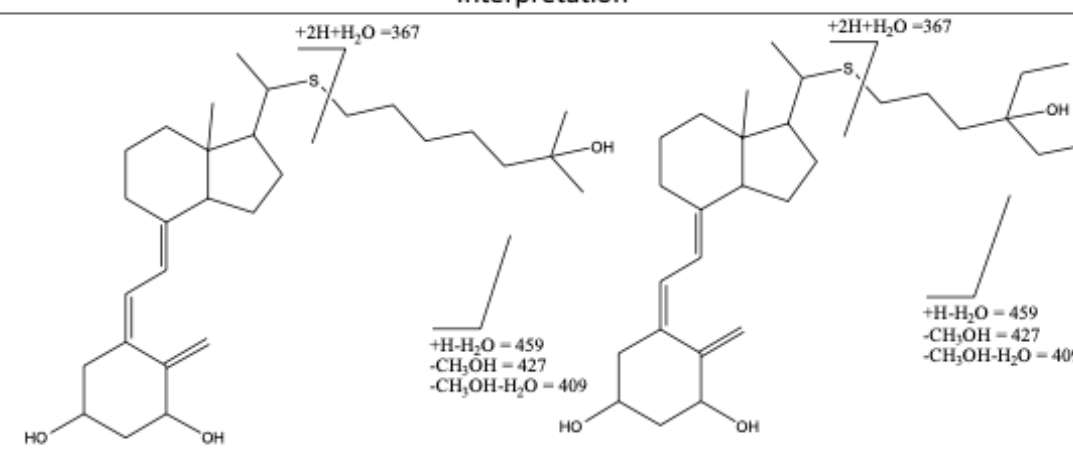 <p><math>+2\text{H}+\text{H}_2\text{O} = 367</math><br/><math>+ \text{H}-\text{H}_2\text{O} = 459</math><br/><math>-\text{CH}_3\text{OH} = 427</math><br/><math>-\text{CH}_3\text{OH}-\text{H}_2\text{O} = 409</math></p> <p><math>+2\text{H}+\text{H}_2\text{O} = 367</math><br/><math>+ \text{H}-\text{H}_2\text{O} = 459</math><br/><math>-\text{CH}_3\text{OH} = 427</math><br/><math>-\text{CH}_3\text{OH}-\text{H}_2\text{O} = 409</math></p> <p><math>(5Z,7E)-(1S,3R)-26,27\text{-dimethyl-24a-homo-9,10-seco-22-thia-5,7,10(19)-cholestatriene-1,3,25-triol}</math><br/><math>(5Z,7E)-(1S,3R)-24a,24b,24c\text{-trihomo-9,10-seco-22-thia-5,7,10(19)-cholestatriene-1,3,25-triol}</math></p> |                                                                                                                                                                                                                                                                                                                       |               |          |
| Product ion spectrum                                                                                                                                                                                                                                                                                                                                                                                                                                                                                                                                                                                                                                                                                                                                                                     |                                                                                                                                                                                                                                                                                                                       |               |          |
|  <p><math>+ \text{MS2}(459.3), 12.9\text{min} \#1247</math></p>                                                                                                                                                                                                                                                                                                                                                                                                                                                                                                                                                                                                                                      |                                                                                                                                                                                                                                                                                                                       |               |          |

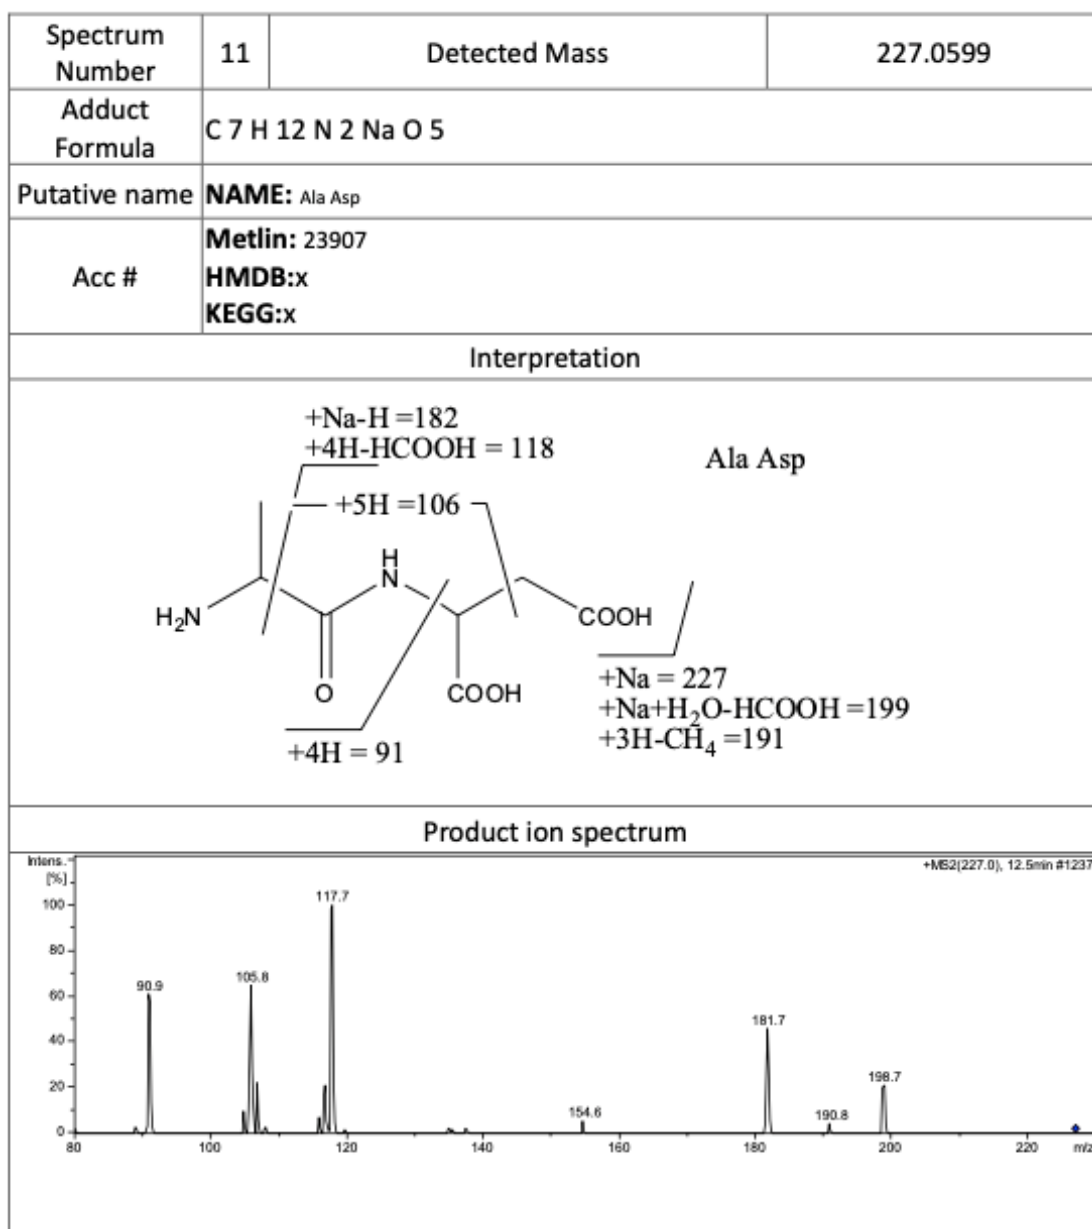

Supplement: s1 [file s1]
