# Supplementary material for: Urinary Metabolomic Analysis of Prostate Cancer by UPLC-FTMS and UPLC-Ion Trap MSn
Source: MDPI journal article supplement (doi:10.3390/diagnostics13132270), 2023-07-04
Supplement: s1 [file s1]

Table S1a

Supplementary Table S1a    Clinical data    of 27 PCa patients and 49 BPH patients with analysis results of four metabolites

| Patient | Age | Smoke | Hem | UTI | HTN | DM | Cr   | Hb   | Hepatitis | Dipeptid | Vit D | Urobilinog | DHpregnenolo | iPSA  | G | Stage   |
|---------|-----|-------|-----|-----|-----|----|------|------|-----------|----------|-------|------------|--------------|-------|---|---------|
|         |     |       |     |     |     |    |      |      |           | e        |       | en         |              |       |   |         |
|         |     |       |     |     |     |    |      |      |           |          |       |            |              |       |   |         |
| PCa01   | 59  | 0     | 0   | 0   | 1   | 0  | 0.88 | 13.7 | 1         | 0        | 0     | 0          | 141091       | 5.773 | 8 | T3aN0M0 |

|       |    |   |   |   |   |   |       |      |   |        |       |   |         |        |   |             |
|-------|----|---|---|---|---|---|-------|------|---|--------|-------|---|---------|--------|---|-------------|
| PCa02 | 68 | 1 | 0 | 0 | 1 | 0 | 0.99  | 12.1 | 0 | 0      | 0     | 0 | 47020   | 8.08   | 9 | T3bN0M<br>x |
| PCa03 | 70 | 0 | 0 | 0 | 1 | 0 | 1.12  | 12   | 0 | 0      | 0     | 0 | 1100198 | 11.4   | 7 | T3bN0M<br>0 |
| PCa04 | 67 | 0 | 0 | 0 | 1 | 0 | 0.86  | 12.2 | 1 | 0      | 46883 | 0 | 90653   | 17.13  | 9 | T3bN0M<br>0 |
| PCa05 | 81 | 1 | 0 | 0 | 1 | 1 | 1.62  | 9    | 0 | 0      | 0     | 0 | 42607   | 12.738 | 7 | T1cN0M<br>0 |
| PCa06 | 76 | 0 | 0 | 0 | 1 | 0 | 1.08  | 14.5 | 0 | 0      | 0     | 0 | 275199  | 10.86  | 8 | T2cN0M<br>0 |
| PCa07 | 65 | 0 | 0 | 0 | 1 | 0 | 0.69  | 13.3 | 0 | 0      | 0     | 0 | 297848  | 2575   | 7 | T4N1M1      |
| PCa08 | 70 | 0 | 0 | 0 | 1 | 1 | .0.86 | 9.5  | 1 | 0      | 0     | 0 | 166978  | 14.78  | 8 | T2N0M0      |
| PCa09 | 78 | 1 | 1 | 1 | 1 | 0 | 2.03  | 10.4 | 0 | 103483 | 0     | 0 | 78711   | 36.68  | 9 | T3aN0M<br>0 |
| PCa10 | 68 | 0 | 0 | 0 | 1 | 0 | 1.14  | 14.3 | 0 | 0      | 0     | 0 | 622550  | 4.7    | 6 | T2cN0M<br>0 |
| PCa11 | 63 | 0 | 0 | 0 | 0 | 0 | 0.99  | 13.6 | 0 | 29879  | 0     | 0 | 973039  | 6.51   | 6 | T2cN0M<br>0 |

|       |    |   |   |   |   |   |      |      |   |   |   |       |         |        |   |             |
|-------|----|---|---|---|---|---|------|------|---|---|---|-------|---------|--------|---|-------------|
| PCa12 | 63 | 1 | 0 | 0 | 1 | 0 | 1.01 | 15   | 1 | 0 | 0 | 39785 | 380323  | 3.68   | 6 | T2cN0M<br>0 |
| PCa13 | 66 | 0 | 1 | 0 | 1 | 1 | -    | 13   | 1 | 0 | 0 | 0     | 403424  | 11.7   | 7 | T2cN0M<br>0 |
| PCa14 | 76 | 0 | 0 | 0 | 1 | 1 | 1.5  | 8.2  | 0 | 0 | 0 | 0     | 58301   | 8433   | 8 | TxNxM1      |
| PCa15 | 84 | 0 | 0 | 0 | 0 | 0 | 0.88 | 11   | 0 | 0 | 0 | 0     | 77520   | 20.34  | 9 | T2cN0M<br>0 |
| PCa16 | 58 | 0 | 0 | 0 | 1 | - | 0.85 | 14.2 | 1 | 0 | 0 | 0     | 234584  | 40.38  | 7 | T3bN0M<br>0 |
| PCa17 | 76 | 0 | 0 | 0 | 0 | 0 | 0.83 | 13.6 | - | 0 | 0 | 0     | 301517  | 9      | 7 | T2cN0M<br>0 |
| PCa18 | 56 | 0 | 0 | 0 | 0 | 0 | 0.73 | 14.5 | 1 | 0 | 0 | 0     | 134952  | 11.25  | 9 | T3N0Mx      |
| PCa19 | 73 | 1 | 0 | 0 | 0 | 0 | 0.89 | 13.9 | 0 | 0 | 0 | 0     | 0       | 11.58  | 7 | T3bN1M<br>1 |
| PCa20 | 75 | 1 | 0 | 0 | 1 | 0 | 1.02 | 12.9 | 0 | 0 | 0 | 0     | 1330747 | 24.97  | 7 | T4N1M1      |
| PCa21 | 67 | 0 | 0 | 0 | 0 | 0 | 2.3  | 10   | 0 | 0 | 0 | 0     | 911468  | 175.53 | 9 | T4N1M1      |

|       |    |   |   |   |   |   |      |      |   |        |        |        |        |       |   |             |
|-------|----|---|---|---|---|---|------|------|---|--------|--------|--------|--------|-------|---|-------------|
| PCa22 | 65 | 0 | 0 | 0 | 0 | 0 | 0.88 | 11.9 | 0 | 0      | 45852  | 0      | 172578 | 8.3   | 7 | T2N0M0      |
| PCa23 | 67 | 1 | - | - | 0 | 0 | 0.62 | 9.6  | 1 | 0      | 61187  | 0      | 407458 | 197   | 9 | TxNxM1      |
| PCa24 | 70 | 1 | 0 | 0 | 0 | 0 | 0.77 | 14.8 | 0 | 0      | 0      | 39085  | 702634 | 17.32 | 6 | T3aN0M<br>x |
| PCa25 | 64 | 0 | 0 | 0 | 0 | 0 | 1.22 | 11.9 | 0 | 0      | 0      | 0      | 294403 | 39.47 | 9 | T3bN0M<br>0 |
| PCa26 | 80 | 1 | 1 | 1 | 0 | 0 | 1.31 | 13.7 | 0 | 0      | 0      | 0      | 346504 | 7     | 9 | T3N0M0      |
| PCa27 | 67 | 0 | 0 | 0 | 1 | 0 | 1    | 15.6 | 0 | 0      | 0      | 43566  | 120368 | 13.52 | 7 | T3aN0M<br>0 |
| BPH01 | 64 | 0 | 0 | 0 | 0 | 0 | 1    | 13.3 | 0 | 128834 | 139006 | 115670 | 142431 |       |   |             |
| BPH02 | 65 | 1 | 0 | 0 | 1 | 1 | 1.2  | 18   | 0 | 343928 | 103151 | 193291 | 119447 |       |   |             |
| BPH03 | 65 | 0 | 0 | 0 | 1 | 0 | 1.01 | 13.7 | 0 | 373912 | 727377 | 136898 | 607633 |       |   |             |

|       |    |   |   |   |   |   |      |      |   |        |        |        |        |        |
|-------|----|---|---|---|---|---|------|------|---|--------|--------|--------|--------|--------|
|       |    |   |   |   |   |   |      |      |   | 141782 |        |        |        |        |
| BPH04 | 70 | 0 | 0 | 1 | 1 | 0 | 4.55 | 12.5 | 0 |        |        |        |        |        |
|       |    |   |   |   |   |   |      |      |   |        | 2      | 86371  | 254761 | 0      |
| BPH05 | 77 | 0 | 0 | 0 | 0 | 0 | 0.87 | 14.9 | 0 | 211161 | 0      | 74858  |        | 0      |
| BPH06 | 68 | 1 | 0 | 0 | 1 | 1 | 0.88 | 13.5 | 0 |        | 0      | 149650 | 101747 | 0      |
| BPH07 | 66 | - | 0 | 0 | 0 | 0 | 1.78 | -    | 0 | 99874  | 122342 | 102409 | 172022 |        |
| BPH08 | 70 | 1 | 0 | 0 | 0 | 0 | 1.2  | 14   | 0 |        | 0      | 109583 | 96765  | 0      |
| BPH09 | 73 | - | 0 | 0 | 1 | 0 | 10   | 15.5 | 0 | 169895 | 0      | 0      |        | 0      |
| BPH10 | 74 | - | 0 | 0 | 0 | 0 | -    | -    | 1 | 274576 | 172688 | 204747 | 75826  |        |
| BPH11 | 60 | - | 0 | 0 | 0 | 0 | 1    | -    | 0 | 628921 | 144546 | 102714 | 112436 |        |
| BPH12 | 55 |   | 0 | 0 | 0 | 0 | -    | -    | 0 |        | 0      | 198884 | 114044 | 655494 |

|       |    |   |   |   |   |   |      |      |   |        |        |        |        |
|-------|----|---|---|---|---|---|------|------|---|--------|--------|--------|--------|
| BPH13 | 69 | 1 | 0 | 0 | 0 | 0 | 0.83 | 12.4 | 0 | 455420 | 137815 | 88383  | 283130 |
| BPH14 | 66 | 0 | 0 | 0 | 0 | 0 | -    | -    | 0 | 0      | 86646  | 86164  | 139071 |
| BPH15 | 60 | - | 1 | 0 | 0 | 0 | 0.79 | -    | 0 | 0      | 86263  | 89393  | 0      |
| BPH16 | 64 | - | 0 | 0 | 0 | 0 | -    | -    | 0 | 393052 | 192179 | 202400 | 190525 |
| BPH17 | 69 | - | 0 | 0 | 1 | 1 | 0.91 | 9.4  | 1 | 218141 | 130096 | 108352 | 294955 |
| BPH18 | 70 | - | 0 | 0 | 1 | 0 | 1.52 | 13.5 | 0 | 0      | 0      | 22290  | 108977 |
| BPH19 | 78 | - | 0 | 0 | 0 | 0 | -    | -    | 0 | 51541  | 0      | 0      | 213594 |
| BPH20 | 58 | 0 | 0 | 0 | 1 | 1 | -    | 14.2 | 0 | 36421  | 0      | 34352  | 209330 |
| BPH21 | 72 | - | 0 | 0 | 0 | 0 | 1.26 | -    | 0 | 0      | 0      | 0      | 0      |
| BPH22 | 66 | 0 | 0 | 0 | 0 | 1 | 0.82 | 15.2 | 0 | 0      | 0      | 37592  | 75811  |

|       |    |   |   |   |   |   |      |      |   |       |   |   |        |
|-------|----|---|---|---|---|---|------|------|---|-------|---|---|--------|
| BPH23 | 69 | 0 | 0 | 0 | 0 | 0 | 0.98 | 13.9 | 0 | 0     | 0 | 0 | 119933 |
| BPH24 | 63 | 1 | 0 | 0 | 1 | 0 | 1.23 | 14.5 | 0 | 0     | 0 | 0 | 247048 |
| BPH25 | 60 | 0 | 0 | 0 | 1 | 0 | 0.96 | 15.1 | 0 | 0     | 0 | 0 | 207263 |
| BPH26 | 79 | - | 0 | 1 | 0 | 0 | 0.99 | -    | 0 | 40767 | 0 | 0 | 68688  |
| BPH27 | 80 | - | 0 | 0 | 1 | 0 | 1.53 | 12.7 | 0 | 0     | 0 | 0 | 0      |
| BPH28 | 76 | 1 | 0 | 0 | 0 | 1 | 0.76 | 10.3 | 0 | 0     | 0 | 0 | 79439  |
| BPH29 | 61 | - | 0 | 0 | 1 | 1 | 0.77 | 16.8 | 0 | 0     | 0 | 0 | 153971 |
| BPH30 | 53 | - | 0 | 0 | 0 | 0 | 2.71 | 13.4 | 0 | 0     | 0 | 0 | 217705 |
| BPH31 | 52 | 0 | 0 | 0 | 1 | 0 | 0.95 | 15.6 | 0 | 0     | 0 | 0 | 314611 |
| BPH32 | 49 | - | 0 | 1 | 0 | 0 | 1.1  | -    | 0 | 0     | 0 | 0 | 0      |

|       |    |   |   |   |   |   |      |      |   |        |       |        |        |
|-------|----|---|---|---|---|---|------|------|---|--------|-------|--------|--------|
| BPH33 | 57 | - | 0 | 0 | 0 | 0 | 0.84 | 14.7 | 0 | 57700  | 0     | 40890  | 399714 |
| BPH34 | 78 | 0 | 0 | 0 | 1 | 0 | -    | 13.6 | 0 | 0      | 0     | 0      | 202547 |
| BPH35 | 65 | - | 0 | 0 | 1 | 1 | -    | 13.8 | 0 | 0      | 0     | 0      | 388267 |
| BPH36 | 76 | 0 | 0 | 0 | 0 | 0 | 0.9  | 12.7 | 0 | 551293 | 66582 | 64191  | 224284 |
| BPH37 | 57 | 0 | 0 | 0 | 0 | 0 | 0.9  | 14.3 | 0 | 28940  | 0     | 0      | 128074 |
| BPH38 | 80 | - | 0 | 0 | 0 | 1 | 0.85 | -    | 0 | 64742  | 0     | 201616 | 217989 |
| BPH39 | 75 | - | 0 | 0 | 0 | 0 | 0.92 | 16.8 | 0 | 68484  | 60059 | 0      | 195436 |
| BPH40 | 57 | - | 0 | 0 | 0 | 0 | 0.85 | 14.5 | 0 | 139129 | 0     | 0      | 0      |
| BPH41 | 73 | 1 | 0 | 0 | 0 | 0 | 1.3  | 13.9 | 1 | 48552  | 59496 | 0      | 124555 |
| BPH42 | 74 | 0 | 0 | 0 | 1 | 0 | 1.24 | 12.7 | 0 | 0      | 0     | 0      | 164663 |



|       |    |   |   |   |   |   |      |      |   |   |       |       |        |
|-------|----|---|---|---|---|---|------|------|---|---|-------|-------|--------|
| BPH43 | 67 | 0 | 0 | 0 | 1 | 0 | -    | 16.1 | 0 | 0 | 0     | 0     | 101485 |
| BPH44 | 82 | - | 0 | 0 | 0 | 0 | -    | -    | 0 | 0 | 58572 | 0     | 147795 |
| BPH45 | 58 | 0 | 0 | 0 | 1 | 0 | 0.97 | 15.5 | 1 | 0 | 0     | 0     | 136126 |
| BPH46 | 68 | 0 | 0 | 0 | 0 | 0 | -    | 13.5 | 0 | 0 | 0     | 23556 | 68927  |
| BPH47 | 77 | - | 0 | 0 | 0 | 0 | 1.04 | -    | 0 | 0 | 0     | 34829 | 58649  |
| BPH48 | 56 | 0 | 0 | 0 | 1 | 0 | 0.9  | 17.2 | 0 | 0 | 0     | 0     | 124966 |
| BPH49 | 83 | 1 | 1 | 1 | 1 | 1 | 0.89 | 12   | 0 | 0 | 0     | 48267 | 153731 |

---

PCa: Prostate cancer; BPH: Benign prostatic hyperpalsia; Hem: Hematuria; UTI: Urinary tract infection; HTN: Hypertension; DM: Diabetes Mellitus; Cr: Serum creatinine; Hb: Hemoglobin; iPSA: Initial PSA ; G: Gleason scoring; "0" : No; "1" : Yes; "-": No Data.

Table S1b

**Supplementary Table S1b    The demography of patients with  
benign prostatic hyperplasia (BPH)   and prostate cancer (PCa)**

| Characteristics | n (%) | BPH | PCa | <i>p</i> -valuess |
|-----------------|-------|-----|-----|-------------------|
|                 |       |     |     |                   |

|                         |           |    |    |       |
|-------------------------|-----------|----|----|-------|
| Age at presentations    |           |    |    | 0.257 |
| $\geq$ 65 years         | 53(69.7)  | 32 | 21 |       |
| < 65 years              | 23 (30.3) | 17 | 6  |       |
| Smoke                   |           |    |    | 0.842 |
| Yes                     | 17(32.1)  | 8  | 9  |       |
| No                      | 36(67.9)  | 18 | 18 |       |
| Hematuria               |           |    |    | 0.219 |
| Yes                     | 5(6.7)    | 2  | 3  |       |
| No                      | 70(93.3)  | 47 | 23 |       |
| Urinary Tract Infection |           |    |    | 0.943 |

|                     |          |    |    |       |
|---------------------|----------|----|----|-------|
| Yes                 | 6(8.0)   | 4  | 2  |       |
| No                  | 69(92.0) | 45 | 24 |       |
| Hypertension        |          |    |    | 0.123 |
| Yes                 | 36(47.4) | 20 | 16 |       |
| No                  | 40(52.6) | 29 | 11 |       |
| Diabetes Mellitus   |          |    |    | 0.547 |
| Yes                 | 14(18.4) | 10 | 4  |       |
| No                  | 62(81.6) | 39 | 23 |       |
| Renal insufficiency |          |    |    | 1.000 |
| Yes (Cr $\geq$ 1.5) | 10(15.4) | 6  | 4  |       |

|              |          |    |    |       |
|--------------|----------|----|----|-------|
| No           | 55(84.6) | 33 | 22 |       |
| Anemia       |          |    |    | 0.087 |
| Yes (Hb< 10) | 5(8.1)   | 1  | 4  |       |
| No           | 57(91.9) | 34 | 23 |       |

---

Setting  $p < 0.05$  by Chi-square as significant difference statistically
